# Supplementary material for: Video Calls for Older Adults: A Narrative Review of Experiments Involving Older Adults in Elderly Care Institutions
Source: PubMed Central journal article supplement (PMC8795665; doi:10.3389/fpubh.2021.751150), 2022-01-14
Supplement: Table_1.pdf [file Table_1.pdf]

## *Supplementary Materials*

### 1 Supplementary Tables

**Table 1.** A summary of the methodological features of the selected studies

| <b>Study</b>                         | <b>Sample</b>              | <b>Study design</b>     | <b>Assessment objective</b>                                            | <b>Assessment Indicators (Method)</b>                                                                        | <b>Benefits of video call use</b>                                                           | <b>Impact on maintaining social interactions</b>                          |
|--------------------------------------|----------------------------|-------------------------|------------------------------------------------------------------------|--------------------------------------------------------------------------------------------------------------|---------------------------------------------------------------------------------------------|---------------------------------------------------------------------------|
| Mickus and Luz (2002) (22)           | Healthy and MCI (n=10)     | Exploratory Qualitative | Feasibility and technology acceptance (Quality and frequency of calls) | Frequency of calls, Perceived usefulness, Ease of use, Satisfaction (Likert scales and open-ended questions) | Satisfaction with videophone use                                                            | Enhanced the quality of social interactions, adding a new value (video)   |
| Sävenstedt <i>et al.</i> (2003) (45) | Dementia (n=7)             | Exploratory Qualitative | Technology acceptance (Quality of communication)                       | Experiences with video-phone (interviews)                                                                    | - Facilitated and enhanced social interactions<br>- Reduced negative feelings (guilt) (FMs) | OAs more focused and involved during conversations                        |
| Hensel <i>et al.</i> (2007) (39)     | Mobility limitations (n=1) | Case study              | Technology utility and usability                                       | Perceived advantages and disadvantages, Experiences of family members in NH placement                        | - Increased social presence<br>- Enhanced the quality of social interactions<br>- Enjoyment | - Increased social presence (video)<br>- Enhanced affective communication |

|                                   |                                                      |                                                            |                                                                 |                                                                                                                                                                                              |                                                                                                         |                                                                                                                                        |
|-----------------------------------|------------------------------------------------------|------------------------------------------------------------|-----------------------------------------------------------------|----------------------------------------------------------------------------------------------------------------------------------------------------------------------------------------------|---------------------------------------------------------------------------------------------------------|----------------------------------------------------------------------------------------------------------------------------------------|
|                                   |                                                      |                                                            |                                                                 | (semi-structured interview)                                                                                                                                                                  | - OAs more involved in the family life                                                                  |                                                                                                                                        |
| Demiris <i>et al.</i> (2008) (40) | NP but “mentally competent” (n= 4)                   | Exploratory Qualitative                                    | Technology acceptance (psychosocial impact), usability, utility | Technical quality, Usability (questionnaire), Perceived utility, Type of conversations, Quality and frequency of communication, Stress, Isolation and Loneliness (semi-structured interview) | - Reduced negative feelings (guilt) (FMs)<br>- Enjoyment                                                | - Enhanced social presence and quality of social interactions, connectedness<br>- Helped to reduce feeling of isolation and loneliness |
| Tsai <i>et al.</i> (2010) (27)    | Healthy and cognitive impairment ( IG n=24; CG n=33) | Quasi Experimental (CG: Receive regular visits)            | Clinical impact (psychological impact)                          | Social support (SSBS), Loneliness (UCLA Loneliness Scale), Depressive status (GDS), Number of calls, number of visits                                                                        | - Enhanced emotional and appraisal social support<br>- Reduced loneliness<br>- Less depressive symptoms | - Helped to reduce feeling of loneliness                                                                                               |
| Tsai and Tsai (2011) (23)         | Healthy and cognitive impairment ( IG n=40; CG n=50) | Randomized longitudinal trial (CG: Receive regular visits) | Clinical impact (psychological impact)                          | Social support (SSBS), Loneliness (UCLA Loneliness Scale), Depressive status (GDS), Number of calls, number of visits                                                                        | - Enhanced emotional and appraisal social support<br>- Reduced loneliness<br>- Less depressive symptoms | - Helped to reduce feeling of loneliness<br>- Enhanced social presence                                                                 |

|                                      |                                                                |                                                         |                                                                                                 |                                                                                                                                                                                     |                                                                                                                      |                                                              |
|--------------------------------------|----------------------------------------------------------------|---------------------------------------------------------|-------------------------------------------------------------------------------------------------|-------------------------------------------------------------------------------------------------------------------------------------------------------------------------------------|----------------------------------------------------------------------------------------------------------------------|--------------------------------------------------------------|
| Siniscarco <i>et al.</i> (2017) (24) | Healthy and cognitive impairment (n=8)                         | Exploratory quantitative & qualitative                  | Clinical impact (impact on loneliness)                                                          | Companionship, emotional loneliness, social isolation, opportunities of nurturance, emotional support, informational support, geriatric depression, video conferencing use (scales) | - Happiness<br>- More involved in the family life                                                                    | NA                                                           |
| Zamir <i>et al.</i> (2018) (25)      | Healthy, cognitive impairment, non-verbal (no dementia) (n=18) | Collaborative Action Research (CAR)<br><br>Ethnographic | Feasibility and acceptance                                                                      | Usability, SoW aesthetics, attitudes, care environment, loneliness and social isolation (observation, unstructured interview, form, memo writing, reflective diary)                 | - OAs more involved in the family life<br>- Enjoyment                                                                | NA                                                           |
| Chiu and Wu (2019) (41)              | NP but no dementia (CG n=17; Group 1 n=19; Group 2 n=18)       | Randomized trial (CG: Receive conventional care)        | Clinical impact (social support, psychological well-being, quality of life) and user experience | Health-related quality of life (SF-12), Social support (TISSB), Happiness (CHI), Depression (CES-D), Cognitive function (SPMSQ), Physical                                           | - Better quality of life (better in Group 2)<br>- Better social support<br>- Happiness<br>- Less depressive symptoms | Better social support with family, friends and staff members |

|                                   |                                                                   |                                               |                                   | functional status (IADL)                                                                                            |                                                                                              |                                         |
|-----------------------------------|-------------------------------------------------------------------|-----------------------------------------------|-----------------------------------|---------------------------------------------------------------------------------------------------------------------|----------------------------------------------------------------------------------------------|-----------------------------------------|
| Moyle <i>et al</i> (2019) (47)    | Healthy and cognitive impairment (no dementia) (n=6)              | Exploratory qualitative                       | Feasibility                       | User Experience and usability (post-intervention semi-structured interview)                                         | NA                                                                                           | NA                                      |
| Niebler <i>et al.</i> (2019) (26) | Cognitive impairment (n=41)                                       | Exploratory qualitative                       | Acceptability                     | User Experience (Semi-structured interviews)                                                                        | - Reduced negative feelings (FMs)<br>- Enjoyment<br>- Enhanced patient-relative relationship | NA                                      |
| Tsai, <i>et al.</i> (2020) (42)   | Healthy and cognitive impairment (no dementia) (IG n=32; CG n=30) | Randomized trial (CG: Receive regular visits) | Clinical impact                   | Feelings of loneliness (UCLA Loneliness Scale), Depressive symptoms (GDS), Quality of life (SF-36)                  | - Reduced loneliness<br>- Better quality of life (pain, vitality, physiological health)      | Enhanced quality of social interactions |
| Sacco, <i>et al.</i> (2020) (44)  | Healthy and cognitive impairment (n=132)                          | Cross-sectional                               | Utility, usability and acceptance | Ability to establish communication (observation), Preferred virtual communication mode, Satisfaction (Likert scale) | NA                                                                                           | NA                                      |

|                                                                                                                                                                                                                                                                                                                                                                                                                                                                                                                                                                                                                                                                  |                                         |                                                         |                                                |                                                                                                            |                                                                                                                                                                                                                                                                                                  |                                                                                                                                                                            |
|------------------------------------------------------------------------------------------------------------------------------------------------------------------------------------------------------------------------------------------------------------------------------------------------------------------------------------------------------------------------------------------------------------------------------------------------------------------------------------------------------------------------------------------------------------------------------------------------------------------------------------------------------------------|-----------------------------------------|---------------------------------------------------------|------------------------------------------------|------------------------------------------------------------------------------------------------------------|--------------------------------------------------------------------------------------------------------------------------------------------------------------------------------------------------------------------------------------------------------------------------------------------------|----------------------------------------------------------------------------------------------------------------------------------------------------------------------------|
| Carcavilla <i>et al.</i> (2020) (43)                                                                                                                                                                                                                                                                                                                                                                                                                                                                                                                                                                                                                             | Healthy (IG n=21; CG n=25)              | Randomized trial (CG: Participate in social activities) | Clinical impact                                | Self-esteem (Likert scale), Positive and negative affects (Scale)                                          | Improves self-esteem                                                                                                                                                                                                                                                                             | NA                                                                                                                                                                         |
| Zamir <i>et al.</i> (2020) (46)                                                                                                                                                                                                                                                                                                                                                                                                                                                                                                                                                                                                                                  | Healthy and cognitive impairment (n=22) | Collaborative Action Research (CAR)<br><br>Ethnographic | Clinical impact, Feasibility and Acceptability | Description of calls, Quality of the intervention (feedback form, observations, semi-structured interview) | <ul style="list-style-type: none"> <li>- OA with dementia remembered some faces, conversations and the activity</li> <li>- Happiness</li> <li>- Enhanced social interactions</li> <li>- Overcome boredom</li> <li>- Increases social connectedness (among residents, SMs, residences)</li> </ul> | <ul style="list-style-type: none"> <li>- Enhanced quality of social interactions</li> <li>- Increased social connectedness (between residents, SMs, residences)</li> </ul> |
| <p>*CES-D = Center for Epidemiologic Studies Depression scale; CHI = Chinese person's Happiness Inventory; FMs = Family Members; GDS = Geriatric Depression Scale; IADL = Instrumental Activities of Daily Living; MCI = Mild Cognitive Impairment; n = number; NA = Not Applicable; NH = Nursing Home; NP = Not Precised; SF-12 = 12-item short form health survey; SF-36 = 36-item short form health survey; SMs = Staff Members; SoW = Skype on Wheels; SPMSQ = Short Portable Mental Status Questionnaire; SSBS = Social Support Behaviors Scale; TISSB = Taiwanese Inventory of Social Supportive Behavior; UCLA = University of California Los Angeles</p> |                                         |                                                         |                                                |                                                                                                            |                                                                                                                                                                                                                                                                                                  |                                                                                                                                                                            |
