# Supplementary material for: Video Calls for Older Adults: A Narrative Review of Experiments Involving Older Adults in Elderly Care Institutions
Source: PubMed Central journal article supplement (PMC8795665; doi:10.3389/fpubh.2021.751150), 2022-01-14
Supplement: Table_2.pdf [file Table_2.pdf]

**Table 2.** General description of the technologies used and the setting of the studies

| Study                                | Device     | Ergonomic adaptation | Tools required         | Role of SMs                                 | Role of researchers                                     | Tool's availability | Setting of use  | Frequency of use                   | Technical issues                                                     |
|--------------------------------------|------------|----------------------|------------------------|---------------------------------------------|---------------------------------------------------------|---------------------|-----------------|------------------------------------|----------------------------------------------------------------------|
| Mickus and Luz (2002) (22)           | Videophone | ✓                    | Telephone line         | Resolve technical issues                    | Help for the first video call, Resolve technical issues | Unlimited           | Resident's room | NP                                 | - Interruption of video connection<br>- No image<br>- Freezing image |
| Sävenstedt <i>et al.</i> (2003) (45) | Videophone | X                    | Telephone line or ADSL | Receive the calls, Resolve technical issues | X                                                       | Punctual            | Resident's room | Once a day (during 3 to 18 months) | NP                                                                   |
| Hensel <i>et al.</i> (2007) (39)     | Videophone | X                    | Telephone line         | X                                           | X                                                       | Unlimited           | Resident's room | Once a week (during 3 months)      | - Audio delays<br>- Small screen<br>- Usability issue                |
| Demiris <i>et al.</i> (2008) (40)    | Videophone | X                    | Telephone line         | NP                                          | NP                                                      | Unlimited           | Resident's room | Once a week (during 3 months)      | - Audio delays                                                       |
| Tsai <i>et al.</i> (2010) (27)       | Laptop     | X                    | Wi-Fi MSN or Skype     | NP                                          | Help during calls                                       | Punctual            | NP              | Once a week (during 3 months)      | NP                                                                   |



|                                                                                                                                                                                         |                       |   |                |                   |                                |          |                   |                                   |                                                                           |
|-----------------------------------------------------------------------------------------------------------------------------------------------------------------------------------------|-----------------------|---|----------------|-------------------|--------------------------------|----------|-------------------|-----------------------------------|---------------------------------------------------------------------------|
| Carcavilla <i>et al.</i><br>(2020) (43)                                                                                                                                                 | TV                    | X | Wi-Fi<br>Skype | NP                | X                              | Punctual | Dedicated<br>room | Twice a week<br>(during 2 weeks)  | NP                                                                        |
| Zamir <i>et al.</i><br>(2020) (46)                                                                                                                                                      | Tablet<br>(SoW)<br>TV | ✓ | Wi-Fi<br>Skype | Make the<br>calls | Resolve<br>technical<br>issues | Punctual | Communal<br>area  | Once a month<br>(during 8 months) | - Small screen (tablet)<br>- Cumbersome (tablet)<br>- Disconnections (TV) |
| ADSL = Asymmetric Digital Subscriber Line; MSN = Microsoft Social Network (Windows Live Messenger) ; NA = Not Applicable; NP = Not Precised; SMs = Staff Members; SoW = Skype on Wheels |                       |   |                |                   |                                |          |                   |                                   |                                                                           |
