# Supplementary material for: Video Calls for Older Adults: A Narrative Review of Experiments Involving Older Adults in Elderly Care Institutions
Source: PubMed Central journal article supplement (PMC8795665; doi:10.3389/fpubh.2021.751150), 2022-01-14
Supplement: Table_3.pdf [file Table_3.pdf]

**Table 3.** A summary of key barriers, enablers and suggested solutions for future studies/research

| <b>Domain</b> | <b>Key barriers to video call use</b>                                                                                                                                                                                                                                                                                                                             | <b>Enablers to video call use</b>                                                                                                                                                                                                                                                                                                                                                     | <b>Solutions for good implementation</b>                                                                                                                                                                                                                                                                                                                                                                                                                                                        |
|---------------|-------------------------------------------------------------------------------------------------------------------------------------------------------------------------------------------------------------------------------------------------------------------------------------------------------------------------------------------------------------------|---------------------------------------------------------------------------------------------------------------------------------------------------------------------------------------------------------------------------------------------------------------------------------------------------------------------------------------------------------------------------------------|-------------------------------------------------------------------------------------------------------------------------------------------------------------------------------------------------------------------------------------------------------------------------------------------------------------------------------------------------------------------------------------------------------------------------------------------------------------------------------------------------|
| Technological | <ul style="list-style-type: none"> <li>- Technical issues (e.g. audio lag, internet disconnection...)</li> <li>- Accessibility and usability of the technology</li> <li>- Lack of support for OAs</li> <li>- Incapacity of OAs for using the technology alone</li> <li>- Lack of adapted training for OAs, FMs and SMs</li> </ul>                                 | <ul style="list-style-type: none"> <li>- Make ergonomic adaptations (tablet support, sensor pen, ...)</li> <li>- Providing technical support for both OAs and SMs</li> <li>- Using modern technology such as telepresence robot, or a bigger screen such as TV</li> <li>- Providing a training for OAs, FMs and SMs</li> </ul>                                                        | <ul style="list-style-type: none"> <li>- Pre-test the technology with OAs to identify possible ergonomic and technical problems, thus potential ergonomic and technical corrections/adaptations</li> <li>- Design and implement an errorless training with spaced retrieval for using the technology for OAs</li> <li>- Providing a regular assisted /facilitated use for OAs who will still encounter problems using the technology but who still want to benefit from the activity</li> </ul> |
| Human-related | <ul style="list-style-type: none"> <li>- Socialization needs already met (in-person visits, telephone calls)</li> <li>- Fatigability of OAs (cognitive, physical, sensory disorders)</li> <li>- OAs' perceived vulnerability against the new technology</li> <li>- Low self-esteem and self-efficacy</li> <li>- Lack of experience with the technology</li> </ul> | <ul style="list-style-type: none"> <li>- Embedding video calls use into regular activities to 'dress-up' the technology (meals, entertainment)</li> <li>- Giving a goal to video calls (teach a new language) to engage motivation and feeling of reward</li> <li>- Providing technical support for OAs and FMs via skilled staff members (via nurses station for example)</li> </ul> | <ul style="list-style-type: none"> <li>- A minimum of one person in the institution needs to be expert, or at least aware of technical issues in order to provide regular support to reassure OAs</li> <li>- Design a specific training/support, or an informational session for FMs to familiarize them with video calling technology</li> </ul>                                                                                                                                               |

|                |                                                                                                                                                                                                                                                                                                                                                                                                                                                                                                                                                                                 |                                                                                                                                                                                       |                                                                                                                                                                                                                                                                                                                                                                                                                 |
|----------------|---------------------------------------------------------------------------------------------------------------------------------------------------------------------------------------------------------------------------------------------------------------------------------------------------------------------------------------------------------------------------------------------------------------------------------------------------------------------------------------------------------------------------------------------------------------------------------|---------------------------------------------------------------------------------------------------------------------------------------------------------------------------------------|-----------------------------------------------------------------------------------------------------------------------------------------------------------------------------------------------------------------------------------------------------------------------------------------------------------------------------------------------------------------------------------------------------------------|
|                | <ul style="list-style-type: none"> <li>- Negative attitude towards the technology</li> <li>- Lack of FMs commitment on the use of video calls (social influence)</li> <br/> <li>- The use of the technology is too demanding (cognitive load) and stirs strong negative feelings (emotional load)</li> <br/> <li>- Dependence of FMs or OAs over SMs</li> </ul>                                                                                                                                                                                                                 |                                                                                                                                                                                       |                                                                                                                                                                                                                                                                                                                                                                                                                 |
| Organizational | <ul style="list-style-type: none"> <li>- The organization and delivery of video calls activities is a complex process (taking appointments, preparing materials, providing assistance, troubleshooting)</li> <br/> <li>- For SMs the activity may result in additional workload</li> <br/> <li>- Shortage of personnel in institutions</li> <br/> <li>- Important SMs turnover (loss of key video call information)</li> <br/> <li>- SMs lack of experience with the technology and low self-efficacy</li> <br/> <li>- SMs who are not interested in video calls use</li> </ul> | <ul style="list-style-type: none"> <li>- Providing punctual training or informational sessions for SMs</li> <br/> <li>- Arouse SMs' interest by giving them an active role</li> </ul> | <ul style="list-style-type: none"> <li>- As video calls use depends on SMs' engagement, first embed video calls into daily activities (as part of an entertainment or a competition) would engage SMs in future calls with FMs</li> <br/> <li>- Study the capacity of SMs to use video calling technology in the current working conditions in order to assess the feasibility of the implementation</li> </ul> |

|                                                                      |                                                                                                                                                                                                                                                                                                                                                                                                                                                                                                                                          |                                                                                                                                                                                                                                                                                                                                                                                                      |                                                                                                                                                                                                                                                                                                                                                                                                                                                                                                                                                                          |
|----------------------------------------------------------------------|------------------------------------------------------------------------------------------------------------------------------------------------------------------------------------------------------------------------------------------------------------------------------------------------------------------------------------------------------------------------------------------------------------------------------------------------------------------------------------------------------------------------------------------|------------------------------------------------------------------------------------------------------------------------------------------------------------------------------------------------------------------------------------------------------------------------------------------------------------------------------------------------------------------------------------------------------|--------------------------------------------------------------------------------------------------------------------------------------------------------------------------------------------------------------------------------------------------------------------------------------------------------------------------------------------------------------------------------------------------------------------------------------------------------------------------------------------------------------------------------------------------------------------------|
| <p>Ethical</p>                                                       | <ul style="list-style-type: none"> <li>- Discrimination in the' selection of participations for video calls sessions (considering <i>a priori</i> that the person will not be able to use the system before trying)</li> <li>- OAs' security concerns and lack of sense of control and confidence in the technology</li> <li>- Privacy issues</li> <li>- Confusion and agitation of cognitively impaired OAs (difficulty in understanding the concept of video calls)</li> <li>- Fear of in-visits replacement by video calls</li> </ul> | <ul style="list-style-type: none"> <li>- Giving all OAs who want to use the system the opportunity to try out (regardless of their limitations)</li> <li>- Providing OAs accessible information about the functioning of the system and how data is treated and secured</li> <li>- Adding a handset near the video calling technology to enhance the comprehension of the activity/system</li> </ul> | <ul style="list-style-type: none"> <li>- Regular informational sessions to reassure OAs about privacy concerns</li> <li>- Explain before each video call the purpose of the technology, as it does not echo OAs' representation of a communication technology (such as the telephone)</li> <li>- Examine OAs' satisfaction during the call to avoid side-effects</li> <li>- Implement regular meetings in order for SMs to exchange about their experiences with video calls use. Benefit-harm and in-person virtual communication balance could be discussed</li> </ul> |
| <p>FMs = Family Members; OAs = Older Adults; SMs = Staff Members</p> |                                                                                                                                                                                                                                                                                                                                                                                                                                                                                                                                          |                                                                                                                                                                                                                                                                                                                                                                                                      |                                                                                                                                                                                                                                                                                                                                                                                                                                                                                                                                                                          |
